# Supplementary material
Source: PubMed Central journal article supplement (PMC381009)
Supplement: 7600101s1.pdf [file 7600101s1.pdf]

**Supplementary Figure 1.** (A) Phylogenetic footprinting of the previously known *id1* BMP-responsive enhancer (Katagiri *et al.*, 2002; Korchynskiy and ten Dijke, 2002; Lopez-Rovira *et al.*, 2002). The SBE and *bre7* motifs are highlighted in blue and red respectively. The SBE and the GC-rich (containing *bre7*) elements were found important for BMP-inducibility. These two elements plus the CREB/ATF motif were shown to mediate repression of *id1* by TGF- $\beta$  (Kang *et al.*, 2003). The presence of the same three motifs within the BREs of *id2* and *id3* (Fig. 7A) may explain both their induction by BMP and their repression by TGF- $\beta$ , similar to *id1* (Kang *et al.*, 2003; Locklin *et al.*, 2001). Aligned are the currently available genomic sequences of *Homo* (h), *Mus* (m), *Rattus* (r), *Canis* (c), *Gallus* (g), *Danio* (d), *Tetraodon* (t) and *Fugu* (f). Genomic sequences were extracted from the public databases, using the whole-genome shotgun data and the annotation browsers of NCBI (<http://www.ncbi.nih.gov>) and the Sanger Centre (<http://www.ensembl.org>). Sequence analyses were performed with the integrated bioinformatic package HUSAR (<http://genome.dkfz-heidelberg.de>). Multiple sequence alignments were created with the programs ClustalW (<http://www.ch.embnet.org/software/ClustalW.html>) and BoxShade ([http://www.ch.embnet.org/software/BOX\\_form.html](http://www.ch.embnet.org/software/BOX_form.html)). Putative transcription factor binding sites were predicted using the program MatInspector (Genomatix; <http://www.genomatix.de/>). (B) Schematic map of the *id1-4* genes: the exons are in blue, the known *id1* BRE is in green and the novel, *in silico* discovered BREs are shown in red colour. (C) Nucleotide sequences of the BRE segments cloned and tested in Fig. 7C. Shown is the length of each segment, its position within human genomic contigs and the conserved part depicted in Fig. 7A,B or Supplementary Fig. 1A is highlighted. The length of each enhancer segment to be cloned was selected according to the *Homo/Mus* sequence conservation (not shown).

Kang, Y., Chen, C.R. and Massagué, J. (2003) A self-enabling TGFbeta response coupled to stress signaling: Smad engages stress response factor ATF3 for Id1 repression in epithelial cells. *Mol Cell* **11**: 915-926.

Katagiri, T., Imada, M., Yanai, T., Suda, T., Takahashi, N. and Kamijo, R. (2002) Identification of a BMP-responsive element in Id1, the gene for inhibition of myogenesis. *Genes Cells* **7**: 949-960.

Korchynskiy, O. and ten Dijke, P. (2002) Identification and functional characterization of distinct critically important bone morphogenetic protein-specific response elements in the Id1 promoter. *J Biol Chem* **277**: 4883-4891.

Locklin, R.M., Riggs, B.L., Hicok, K.C., Horton, H.F., Byrne, M.C. and Khosla, S. (2001) Assessment of gene regulation by bone morphogenetic protein 2 in human marrow stromal cells using gene array technology. *J Bone Miner Res* **16**: 2192-2204.

Lopez-Rovira, T., Chalaux, E., Massagué, J., Rosa, J.L. and Ventura, F. (2002) Direct binding of Smad1 and Smad4 to two distinct motifs mediates bone morphogenetic protein-specific transcriptional activation of Id1 gene. *J Biol Chem* **277**: 3176-3185.

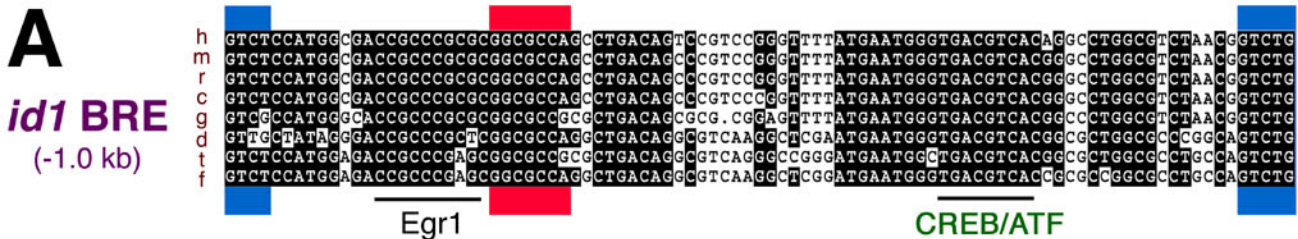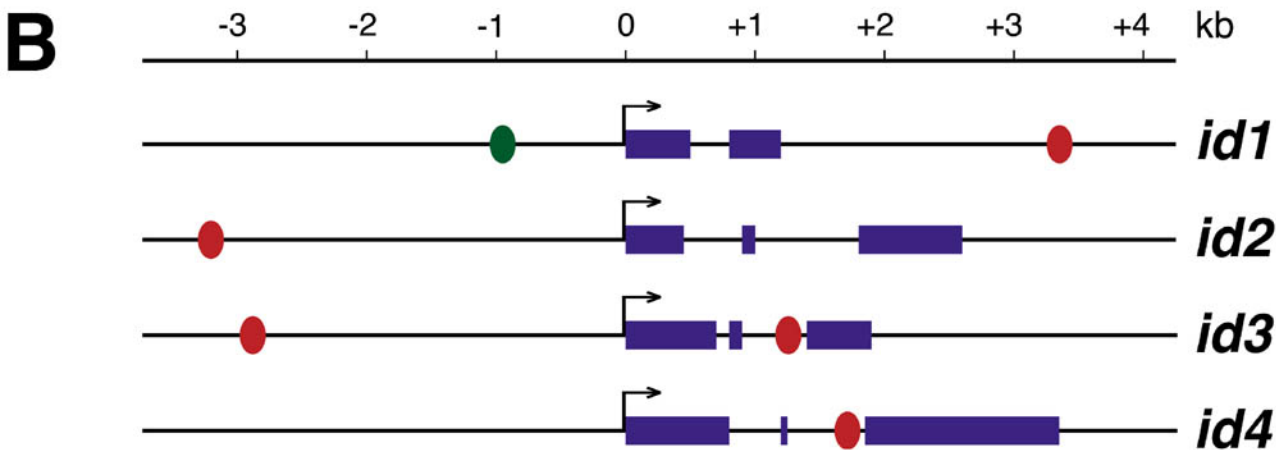

**C**

*id1* (-1.0 kb), 180 bp, NT\_028392.4 (388163 - 388342):  
GGGGAGCACGGGAAGTACTAGCTAGACCAGTTTGTCTGCTCCATGGCGACCGCCCGCGGGGCCAGCCTGAC  
AGTCCGTCGGGTTTATGAATGGGTGACGTCACAGGCCTGGCGTCTAACGGTCTGAGCCGCTGGTTACG  
ACGCTGACACAGACCGGCCCGGGAAGGGAGGGGGGAGACT

*id1* (+3.3 kb), 171 bp, NT\_028392.4 (392419 - 392589):  
CCAGACCCAGCCCATCTGGAGGCCGGCTCCCGCGGGCCTGGGAGCGTTTTCCATCAGCTGGGCCCCGAGGA  
ATGCGGAGCTATTTAACTGAGCATCCCCAGGTGTACGGAGGGCGCTGGCTGTCTGGGGCCCCGAGCCTT  
TGGCACAGCCGCTAGACAAACAGCGCGCC

*id2* (-3.2 kb), 153 bp, NT\_005334.14 (3653089 - 3653241):  
AGGCATTGATCAGCTGGGCGCGCGCTGAGTGACGGCGCGGTTGCCATGGCAGCCGCCTGAGCGGGCGCC  
CGGAGGACAAGCTGCAGGGCGCGTGAATGGGCGGCGTACGCGCCTGGCGCCAGAGAGTCTGCTCCGG  
GGCTCCGGCTCCG

*id3* (-2.9 kb), 191 bp, NT\_004610.16 (4692256 - 4692066):  
GGAAAGGTTGCTGGGACACGCATCCCTGTGTGAACGCATGACGTCACCCACCTGGCGCCAGGCTGTCTGG  
GGCTGAGTCTTAGATCAACACAGCTGTGGGACCGGGACCCACAGCTGGGCAAAGGAGCGGATTCTCAAC  
AAAAATAGGATTGTGAGAAAAGTTCTGAAACAAAAACAGCGCAGACAAAA

*id3* (+1.3 kb), 153 bp, NT\_004610.16 (4688331 - 4688179):  
CTCCGCTGTGGTCTTTGGCGCCAACTGGGTGGGGGCGAGCTGGGGCGCGGAGTTATCAGCTGGAGGTAC  
AGACCAAGTTTCTCCCTGGCGCCGGCCAGTCTGCGGACGGCCCCCGCCTCGGCACGCTCGGCGGAAACT  
GACTGCTCCTTGG

*id4* (+1.7 kb), 161 bp, NT\_007592.13 (10697561 - 10697721):  
GGGCGGGTGTGTCTGACCTGGTGGTTTTGTTTTGGGTTGTTGATCAAGCATGTCTTGAGTTTTGGTGGTGG  
GCGCCAGTTAGTCTGCAGCGAGAAGGTTACACACCCCCTCTATTCACTTCTTCCACAGGTGTGCGGC  
CGCCTGAGCCCCGAGCCAGGAG
