# Supplementary material
Source: PubMed Central journal article supplement (PMC381009)
Supplement: 7600101s3.pdf [file 7600101s3.pdf]

**Supplementary Table I.** Primers used for RT-PCR.

| <b>Gene</b>                   | <b>forward primer</b>  | <b>reverse primer</b>  |
|-------------------------------|------------------------|------------------------|
| <i>bmpr2</i>                  | ACAACAGTGCAGAATGAGCG   | CTTCTCACCAGTTGTTAAGGGG |
| <i>tsg</i>                    | CAAGGAACTACAGCGATACGC  | TGATGGGAAAGTTCCTCCAC   |
| <i>bmp7</i>                   | ATCTGGGGCACAGAAAAGG    | AGAATGCCACCATAAATGGC   |
| <i>smad6</i>                  | GTGTGTGGGCTTACAACCG    | ACTGTTGGGATCATAGGGTCC  |
| <i>smad7</i>                  | CCAACTTCTTCACGAGACTGG  | GCAGACTGTAAGCCTTTCATAG |
| <i>bambi</i>                  | GAGCGACTCGGAGGGATTACAA | GTACCCAGCGTCACCATCCAGA |
| <i>ef1<math>\alpha</math></i> | TGCCATTGTTGACATGATCCC  | TACTATTAAACTCTGATGGCC  |

**Supplementary Table II.** Point-mutations in the *bambi* and *vent2* enhancers.

The mutated transcription factor binding motifs are underlined.

| <b>Construct</b> | <b>wild-type sequence</b> | <b>mutated sequence</b> |
|------------------|---------------------------|-------------------------|
| <i>bambi:</i>    |                           |                         |
| pM1              | GGTGCATGTT                | GGTGttTGTT              |
| pM2              | GGAATTAGCA                | GGAAtcatGCA             |
| pM3              | TTAGCATATG                | TTAGatTATG              |
| pM4              | TGATATTGATC               | CTGAattattTC            |
| pM5              | GATCAGACCG                | GATCAatgCG              |
| pM6              | GCCTTTGTTG                | GCCaaaGTTG              |
| pM7              | GGATAATTGA                | GGATttTTGA              |
| pM8              | TCAGTCTGTG                | TCAcatTGTG              |
| pM9              | TGTGTCGTG                 | TGTcatTGTG              |
| pM10             | GTCGTCTCAG                | GTCcatTCAG              |
| pM11             | GTGGCGCCGG                | GTGaaaatGG              |
| pM12             | TGCTAATTTG                | TGCatgTTTG              |
| pM13             | TGCTAATTTT                | TGCatgTTTT              |
| pM14             | AACGTCTGCT                | AACcatTGCT              |
| <i>vent2:</i>    |                           |                         |
| mut1             | TTAGCATAAC                | TTAaaATAAC              |
| mut2             | TGTGCATTTA                | TGTaaATTTA              |
| mut3             | CGGCAGACAT                | CGGaaaACAT              |
| mut4             | GGTGGAGCCAG               | GGTttttCCAG             |
| mut5             | GCCTTTGATAG               | GCCTccaATAG             |
